# Supplementary material for: Synthesis, electronic structure and physical properties of two new layered compounds, EuFAgSe and EuFAg1−δTe, featuring the active redox pair Eu2+/Ag+
Source: Royal Society of Chemistry journal article supplement (doi:10.1039/d0dt01504k), 2020-01-01
Supplement: d0dt01504k1.pdf [file d0dt01504k1.pdf]

## Supplementary information

### **Synthesis, electronic structure and physical properties of two new layered compounds, EuFAgSe and EuFAg<sub>1- $\delta$</sub> Te, featuring the active redox pair Eu<sup>2+</sup>/Ag<sup>+</sup>**

Igor V. Plokhikh, Alexander A. Tsirlin, Lukas Heletta, Steffen Klenner, Dmitri O. Charkin,  
Alexey N. Kuznetsov, Andrei V. Shevelkov, Rainer Pöttgen, Arno Pfitzner

**Table S1.** Selected bond distances in Å and angles in deg. for the  $M^{2+}FTCh$  ( $T = \text{Cu, Ag}$ ;  $Ch = \text{S, Se, Te}$ ) fluoride chalcogenides.

|                            | <b>SrFCuS</b> <sup>a</sup> | <b>SrFCuSe</b> <sup>a</sup> | <b>SrFCuTe</b> <sup>b</sup> | <b>SrFAgS</b> <sup>b</sup> | <b>SrFAgSe</b> <sup>b</sup> | <b>SrFAgTe</b> <sup>b</sup>                    |
|----------------------------|----------------------------|-----------------------------|-----------------------------|----------------------------|-----------------------------|------------------------------------------------|
| $d(\text{Sr} - \text{F})$  | 2.445(1)                   | 2.476(1)                    | 2.515(1)                    | 2.468(2)                   | 2.503(1)                    | 2.543(1)                                       |
| $d(\text{Sr} - \text{Ch})$ | 3.144(2)                   | 3.239(2)                    | 3.427(1)                    | 3.190(3)                   | 3.272(1)                    | 3.456(1)                                       |
| $d(\text{T} - \text{Ch})$  | 2.430(2)                   | 2.531(2)                    | 2.671(1)                    | 2.699(5)                   | 2.761(1)                    | 2.871(1)                                       |
| $\alpha_2(\text{SrFSr})$   | 108.00(2)                  | 110.26(4)                   | 115.32(7)                   | 108.88(5)                  | 112.64(5)                   | 117.1(1)                                       |
| $\alpha_4(\text{SrFSr})$   | 110.21(2)                  | 109.08(4)                   | 106.63(3)                   | 110.67(5)                  | 107.91(2)                   | 105.79(5)                                      |
| $\alpha_2(\text{ChTCh})$   | 108.95(5)                  | 106.75(5)                   | 105.39(5)                   | 97.50(1)                   | 97.92(4)                    | 98.19(5)                                       |
| $\alpha_4(\text{ChTCh})$   | 109.73(5)                  | 110.85(5)                   | 111.55(3)                   | 115.77(1)                  | 115.54(2)                   | 115.39(3)                                      |
|                            | <b>BaFCuS</b> <sup>b</sup> | <b>BaFCuSe</b> <sup>b</sup> | <b>BaFCuTe</b> <sup>b</sup> | <b>BaFAgS</b> <sup>b</sup> | <b>BaFAgSe</b> <sup>b</sup> | <b>BaFAgTe</b> <sup>c</sup>                    |
| $d(\text{Ba} - \text{F})$  | 2.607(1)                   | 2.620(1)                    | 2.652(1)                    | 2.626(1)                   | 2.642(1)                    | 2.668(1)                                       |
| $d(\text{Ba} - \text{Ch})$ | 3.305(2)                   | 3.387(1)                    | 3.561(1)                    | 3.337(2)                   | 3.422(1)                    | 3.586(1)                                       |
| $d(\text{T} - \text{Ch})$  | 2.464(3)                   | 2.565(1)                    | 2.694(1)                    | 2.679(2)                   | 2.753(1)                    | 2.879(1)                                       |
| $\alpha_2(\text{BaFBa})$   | 104.50(4)                  | 108.01(3)                   | 113.25(3)                   | 107.69(2)                  | 110.65(3)                   | 116.15(1)                                      |
| $\alpha_4(\text{BaFBa})$   | 112.01(2)                  | 110.21(3)                   | 107.61(3)                   | 110.37(1)                  | 108.88(1)                   | 106.24(1)                                      |
| $\alpha_2(\text{ChTCh})$   | 107.4(1)                   | 111.44(3)                   | 110.62(3)                   | 104.65(8)                  | 104.22(5)                   | 103.69(1)                                      |
| $\alpha_4(\text{ChTCh})$   | 113.6(2)                   | 108.50(3)                   | 108.90(3)                   | 111.93(4)                  | 112.16(2)                   | 112.43(1)                                      |
|                            | <b>EuFCuS</b> <sup>a</sup> | <b>EuFCuSe</b> <sup>a</sup> | <b>EuFCuTe</b> <sup>c</sup> | <b>EuFAgS</b>              | <b>EuFAgSe</b>              | <b>EuFAg<sub>1-<math>\delta</math></sub>Te</b> |
| $d(\text{Eu} - \text{F})$  | 2.465(2)                   | 2.488(2)                    | 2.520(1)                    | -                          | 2.508(1)                    | 2.540(1)                                       |
| $d(\text{Eu} - \text{Ch})$ | 3.134(2)                   | 3.223(2)                    | 3.393(1)                    | -                          | 3.250(1)                    | 3.424(1)                                       |
| $d(\text{T} - \text{Ch})$  | 2.434(1)                   | 2.521(1)                    | 2.666(1)                    | -                          | 2.758(1)                    | 2.881(1)                                       |
| $\alpha_2(\text{EuFEu})$   | 106.44(5)                  | 109.21(5)                   | 114.40(1)                   | -                          | 111.85(2)                   | 115.87(1)                                      |
| $\alpha_4(\text{EuFEu})$   | 111.01(5)                  | 109.60(5)                   | 107.06(1)                   | -                          | 108.29(1)                   | 97.30(1)                                       |
| $\alpha_2(\text{ChTCh})$   | 108.46(2)                  | 107.15(3)                   | 105.27(1)                   | -                          | 97.73(3)                    | 105.96(1)                                      |
| $\alpha_4(\text{ChTCh})$   | 109.98(2)                  | 110.64(3)                   | 111.61(1)                   | -                          | 115.64(2)                   | 116.75(2)                                      |

<sup>a</sup>E. Motomitsu, H. Yanagi, T. Kamiya, M. Hirano, H. Hosono Synthesis, structure and physical properties of layered semiconductors  $MCuFCh$  ( $M = Sr, Eu, Ch = S, Se$ ). *J. Solid State Chem.* **2006**, *179*, 1668.

<sup>b</sup>D. O.Charkin, A. V. Urmanov, S. M. Kazakov. Preparation and crystal structures of novel LaOAgS-type copper and silver fluoride chalcogenides. *J. Alloys Compd.* **2012**, *516*, 134.

<sup>c</sup>O. Janka, T. Schleid. CuEuFTe und AgBaFTe: Zwei neue Münzmetall(I)-Fluorid-Telluride mit unterschiedlichen  $M^{2+}$ -Kationen. *Z. Anorg. Allg. Chem.* **2008**, *634*, 2048.

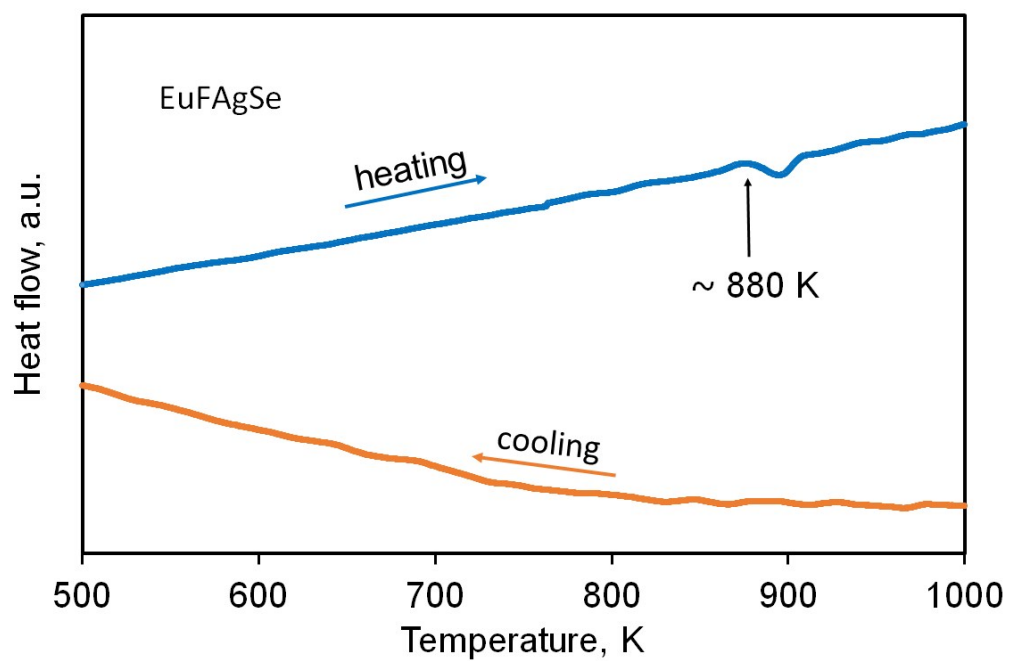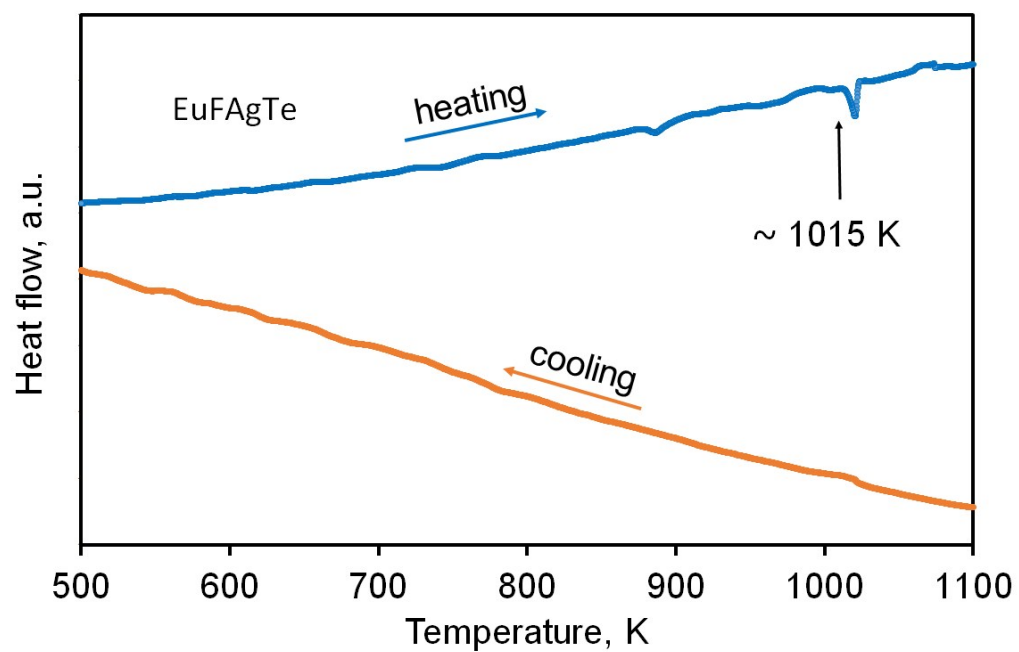

**Figure S1.** Differential thermal analysis plots for EuFAgSe and EuFAgTe.

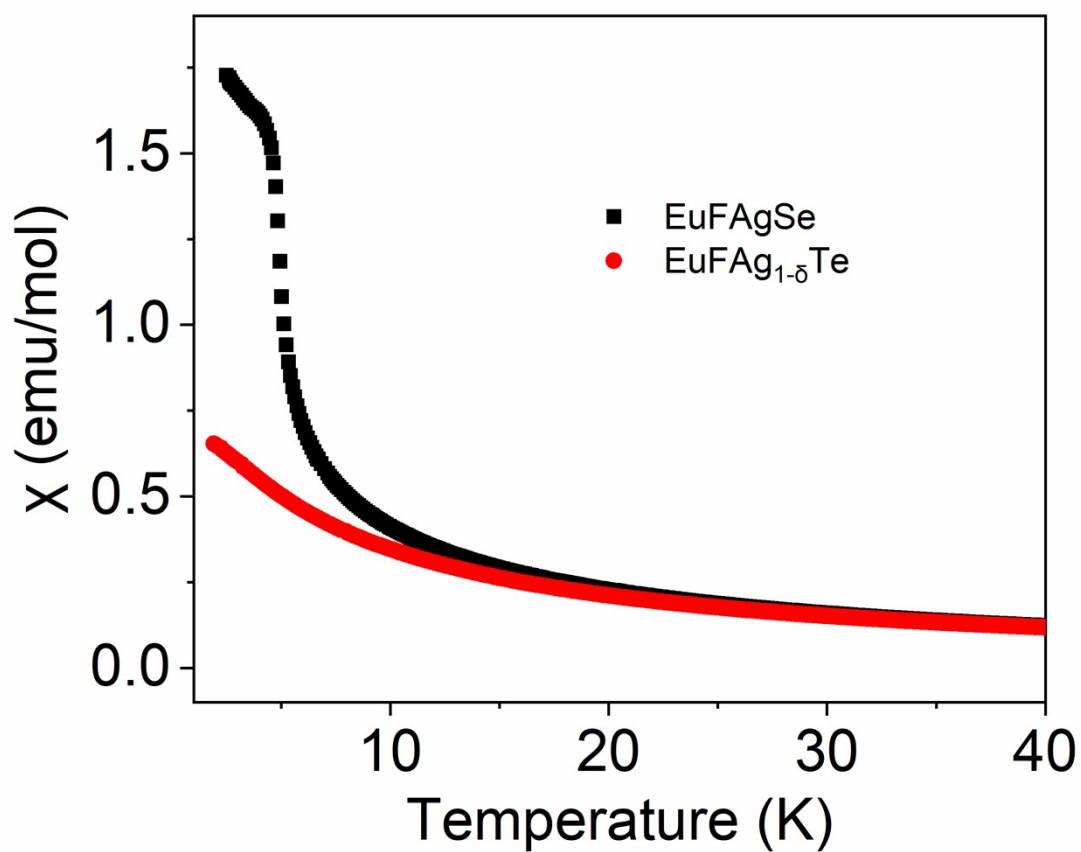

**Figure S2.** Magnetic susceptibility curves for EuFAgSe and EuFAg<sub>1-δ</sub>Te measured in 0.01 T field.
